# Supplementary material for: Carbon footprint of global natural gas supplies to China
Source: PubMed Central journal article supplement (PMC7012848; doi:10.1038/s41467-020-14606-4), 2020-02-11
Supplement: 41467_2020_14606_MOESM3_ESM.pdf [file 41467_2020_14606_MOESM3_ESM.pdf]

### **Description of Additional Supplementary Files**

File Name: Supplementary Data 1

Description: Share of gas supply from each field, current and projection (%)

File Name: Supplementary Data 2

Description: Field-specific inputs and data sources

File Name: Supplementary Data 3

Description: Transmission distances between gas fields and supply destinations for gas fields connected to Chinese pipeline system(km)

File Name: Supplementary Data 4

Description: Electricity grid mix of different gas production countries
